# Supplementary material for: Pupillary Light Reflexes in Severe Photoreceptor Blindness Isolate the Melanopic Component of Intrinsically Photosensitive Retinal Ganglion Cells
Source: PubMed Central journal article supplement (PMC5490362; doi:10.1167/iovs.17-21909), 2017-07

# **Pupillary Light Reflexes in Severe Congenital Photoreceptor Blindness Isolate the Melanopic Component of Intrinsically-photosensitive Retinal Ganglion Cells**

Jason Charng, Samuel G Jacobson, Elise Heon, Alejandro J. Roman, David B. McGuigan 3rd, Rebecca Sheplock, Mychajlo S. Kosyk, Malgorzata Swider, Artur V. Cideciyan

## **SUPPLEMENTARY MATERIALS**

SUPPLEMENTARY TABLE 1

SUPPLEMENTARY FIGURE LEGENDS AND FIGURES FOR:

FIGURE S1

FIGURE S2

FIGURE S3

**Suppl. Table 1. Clinical and molecular characteristics of LCA patients**

| Patient               | Age(yrs) /gender | Allele 1            | Allele 2             | Eye | VA  | Lens   | FST (log) | PLR to 5s |
|-----------------------|------------------|---------------------|----------------------|-----|-----|--------|-----------|-----------|
| <b><i>GUCY2D</i></b>  |                  |                     |                      |     |     |        |           |           |
| P1                    | 3/M              | c.91_92 insC        | Glu103Lys            | RE  | NLP | Clear  | N/A       | Y         |
| P2                    | 9/M              | Arg768Trp           | Arg768Trp            | LE  | NLP | Clear  | >8        | Y         |
| P3                    | 11/M             | Arg768Trp           | Ser981 del1bp        | LE  | NLP | 2+ PSC | >8        | N         |
| P4                    | 14/F             | Gln156x             | Ser819 del1bp        | RE  | LP  | Clear  | 2.7       | Y         |
| P5                    | 26/M             | Ser981 del1bp       | Ser981 del1bp        | RE  | LP  | Clear  | 7.6       | N         |
| P6                    | 37/F             | Leu865 del1bp       | Met476 ins10bp       | LE  | LP  | Clear  | >8        | Y         |
| <b><i>CEP290</i></b>  |                  |                     |                      |     |     |        |           |           |
| P7                    | 13/F             | c.2991+1655A>G      | c.1189+1G>C          | RE  | NLP | Clear  | >8        | Y         |
| P8                    | 9/M              | c.2991+1655A>G      | c.289G>T             | LE  | NLP | 1+ PSC | >8        | Y         |
| P9                    | 13/M             | c.2991+1655A>G      | c.4115_4116delTA     | RE  | LP  | Clear  | 7.2       | Y         |
| P10                   | 14/F             | c.2991+1655A>G      | c.547_550delTACC     | RE  | LP  | Clear  | 7.1       | Y         |
| P11                   | 17/F             | c.2991+1655A>G      | c.1550delT           | LE  | LP  | PCS    | 6.9       | Y         |
| P12                   | 18/M             | c.2991+1655A>G      | c.2506_2507delGA     | RE  | LP  | Clear  | 7.3       | Y         |
| P13                   | 24/F             | c.2991+1655A>G      | c.5491delA           | RE  | NLP | Clear  | >8        | Y         |
| P14                   | 29/F             | c.2991+1655A>G      | c.2052+1_2052+2delGT | LE  | LP  | Clear  | 7.2       | Y         |
| P15                   | 48/F             | c.2991+1655A>G      | c.2594_2595delTC     | RE  | LP  | 1+ NS  | 6.6       | Y         |
| P16                   | 51/M             | c.2991+1655A>G      | c.2390delA           | LE  | NLP | 1+ PSC | >8        | N         |
| <b><i>NPHP5</i></b>   |                  |                     |                      |     |     |        |           |           |
| P17                   | 15/M             | Arg489X             | His506 del2cagCA     | RE  | LP  | Clear  | 7.7       | Y         |
| <b><i>AIPL1</i></b>   |                  |                     |                      |     |     |        |           |           |
| P18                   | 23/F             | Thr265Cys           | Thr214Cys            | LE  | LP  | PCS    | 7.1       | Y         |
| P19                   | 40/F             | Trp278X             | Leu241 del3ctGAA     | RE  | LP  | 1+ NS  | 7.9       | Y         |
| <b><i>RPGRIP1</i></b> |                  |                     |                      |     |     |        |           |           |
| P20                   | 14/M             | c.3749-1G>T         | Gln361fs             | LE  | LP  | Clear  | N/A       | Y         |
| <b><i>CLN3</i></b>    |                  |                     |                      |     |     |        |           |           |
| P21                   | 16/M             | 1.02 kb genomic del | 1.02 kb genomic del  | RE  | NLP | Clear  | >8        | Y         |

FST, full-field sensitivity test; LE, left eye; LP, light perception; ND, not detectable; N/A, not available; NLP, no light perception; NS, nuclear sclerosis; PCS, peripheral cortical spokes; PSC, posterior subcapsular opacification; RE, right eye

## **SUPPLEMENTARY FIGURE LEGENDS FOLLOWED BY FIGURES**

**Supplementary Figure 1: Maximal pupil diameter measurements at various gazes.** (A) In a normal dark adapted eye, iris images are shown at central as well as eccentric gaze positions. Yellow outlines demarcate the edges of the pupil in each image. Pairs of arrows show the maximal pupil estimate for each eccentric gaze. In the central view (Image 5), a pair of horizontal and a pair of vertical arrows are used to indicate that both measurements are equal as the pupil is circular in this view. (B) Maximal pupil diameters estimated at various gaze directions, the numbers on the x-axis correspond to the gaze directions marked in Panel A. Horizontal gray line indicates pupil diameter estimated in the central position (Image 5).

**Supplementary Figure 2: Spectral characteristics of white stimuli for Pupillometer I (A) and II (B).**

**Supplementary Figure 3: No detectable PLR in a subset of severe LCA.** Three subjects (P3, P5, P16) showing no discernible PLR to the 5s stimulus with Pupillometer I. Images below the x-axis indicate clear pupil visualization throughout the recording. Stimulus monitors are shown.

**A**

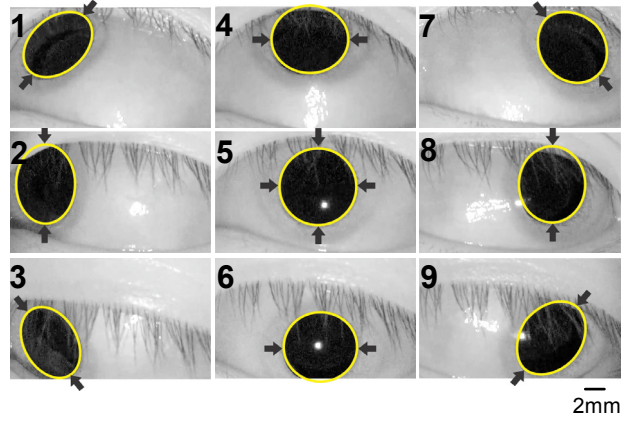

**B**

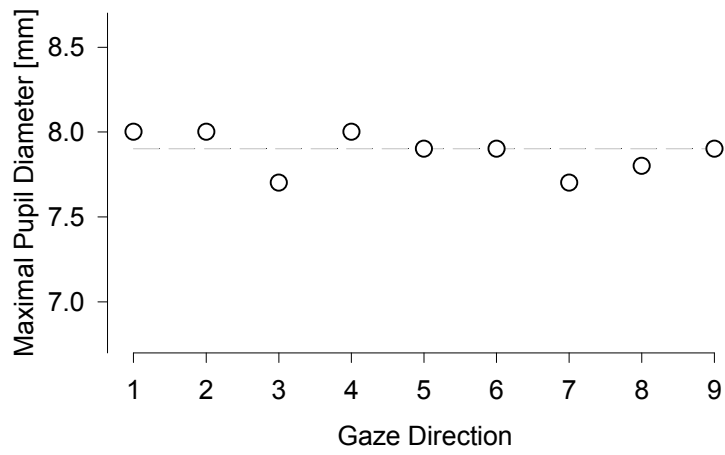

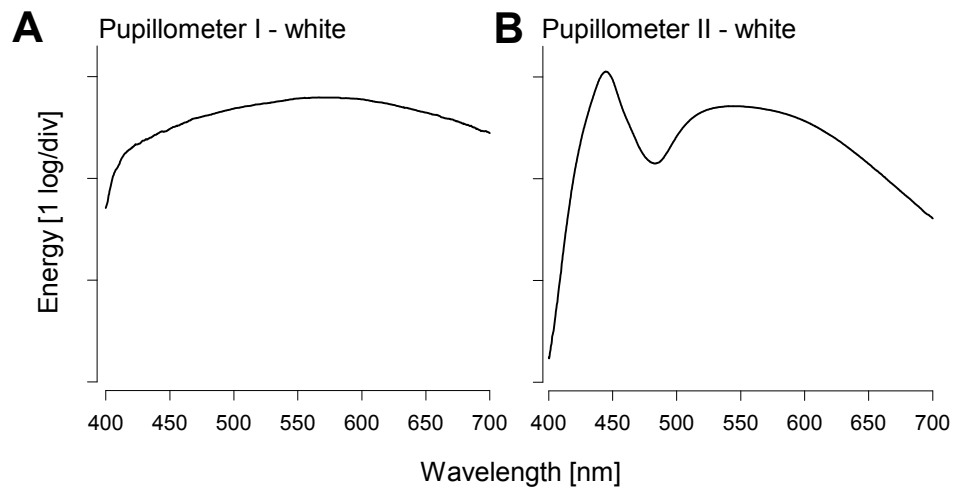

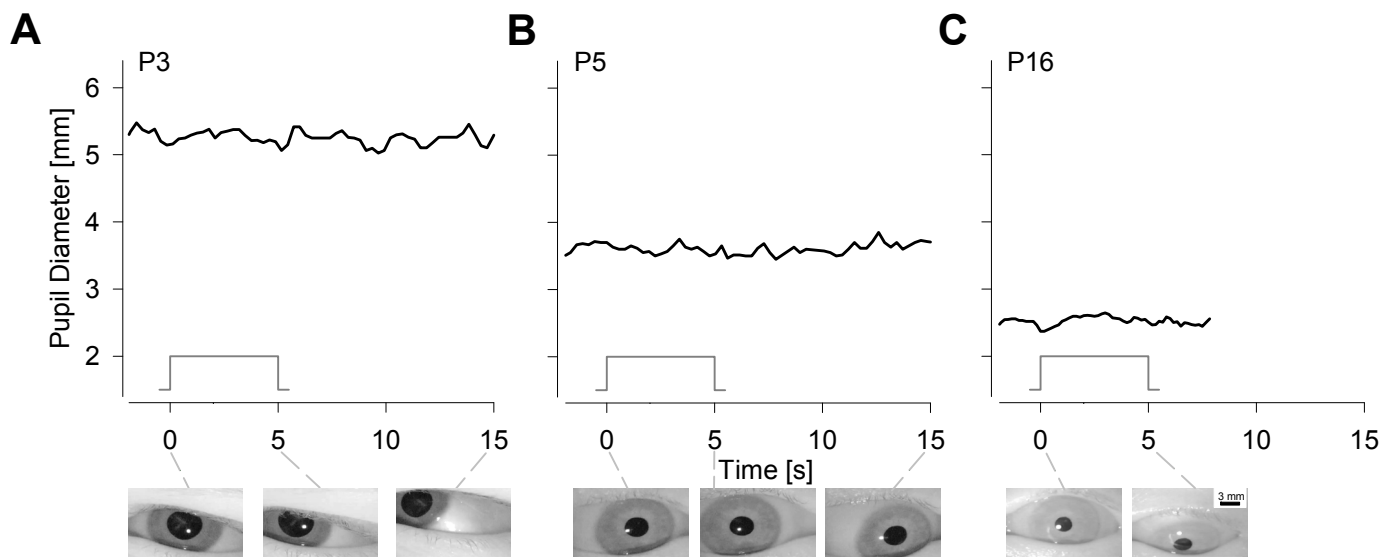

Supplement: iovs-58-07-16_s01.pdf [file iovs-58-07-16_s01.pdf]
